# Supplementary material for: One-step synthesis of uniformly distributed SiOx–C composites as stable anodes for lithium-ion batteries
Source: Royal Society of Chemistry journal article supplement (doi:10.1039/d2dt01843h), 2022-01-01
Supplement: d2dt01843h1.pdf [file d2dt01843h1.pdf]

## Supporting Information

### One-step synthesis of uniformly distributed SiO<sub>x</sub>-C composites as stable anodes for lithium-ion battery

*Siyu Chen*<sup>‡</sup>, *Yanan Xu*<sup>‡</sup>, *Hongbin Du*<sup>\*</sup>

**Figure S1.** TG analysis of the gel precursor in nitrogen atmosphere.

**Figure S2.** N<sub>2</sub> adsorption-desorption isotherms of SiO<sub>x</sub>-C@CNTs.

**Figure S3.** Charge and discharge profiles of (a) SiO<sub>x</sub>-C@CNTs-800 and (b) SiO<sub>x</sub>-C@CNTs-1000.

**Figure S4.** (a) Charge-discharge and (b) CV profiles of carbon material in SiO<sub>x</sub>-C@CNTs-900 (HF etching to remove SiO<sub>x</sub>).

**Figure S5.** PXRD profiles of (a) SiO<sub>x</sub>-C@CNTs-800 and (b) SiO<sub>x</sub>-C@CNTs-1000.

**Figure S6.** SEM images of (a) SiO<sub>x</sub>-C@CNTs-800, (b) SiO<sub>x</sub>-C@CNTs-900, and (c) SiO<sub>x</sub>-C@CNTs-1000. The used electrodes were cycled at a current density of 2 A g<sup>-1</sup> for 200 times.

**Figure S7.** GITT profiles of the SiO<sub>x</sub>-C electrode.

**Figure S8.** The charge-discharge voltage profiles of the LiCoO<sub>2</sub> || SiO<sub>x</sub>-C@CNTs full cell at 0.1 C.

**Figure S9.** The charge-discharge voltage profiles of the LiCoO<sub>2</sub> || SiO<sub>x</sub>-C@CNTs full cell at 1 C.

**Table S1.** Electrochemical performance of the recently-reported SiO<sub>x</sub>-based anodes for half LIBs.

**Table S2.** Cycle stability of the recently-reported SiO<sub>x</sub>-based anode materials in full lithium-ion batteries.

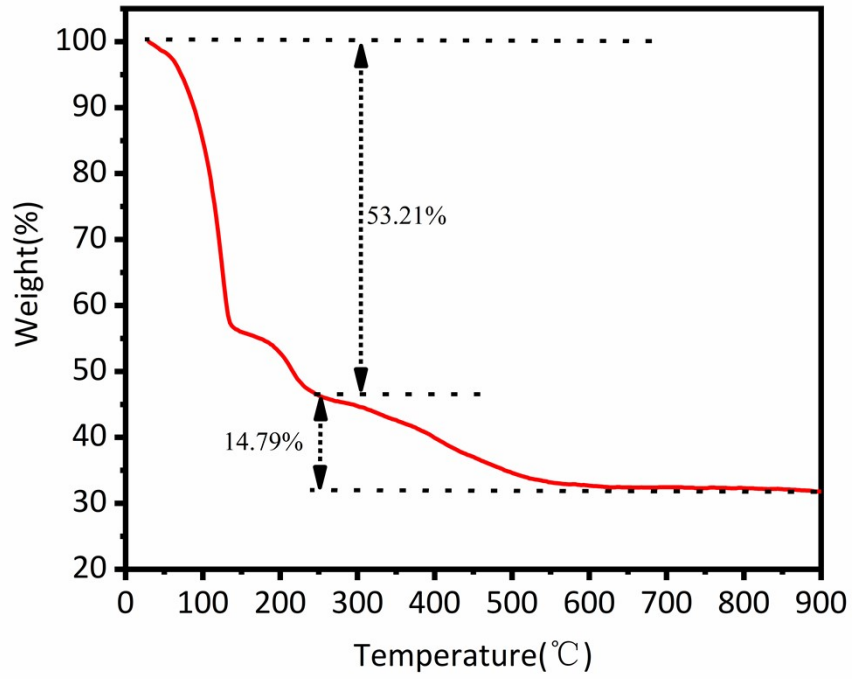

**Figure S1.** TG analysis of the gel precursor in nitrogen atmosphere.

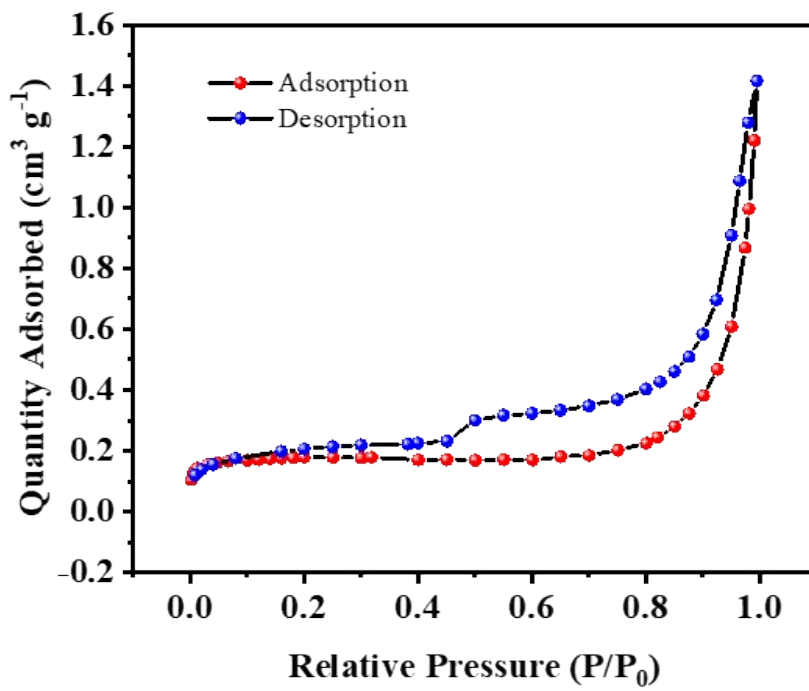

**Figure S2.** N<sub>2</sub> adsorption-desorption isotherms of SiO<sub>x</sub>-C@CNTs-900.

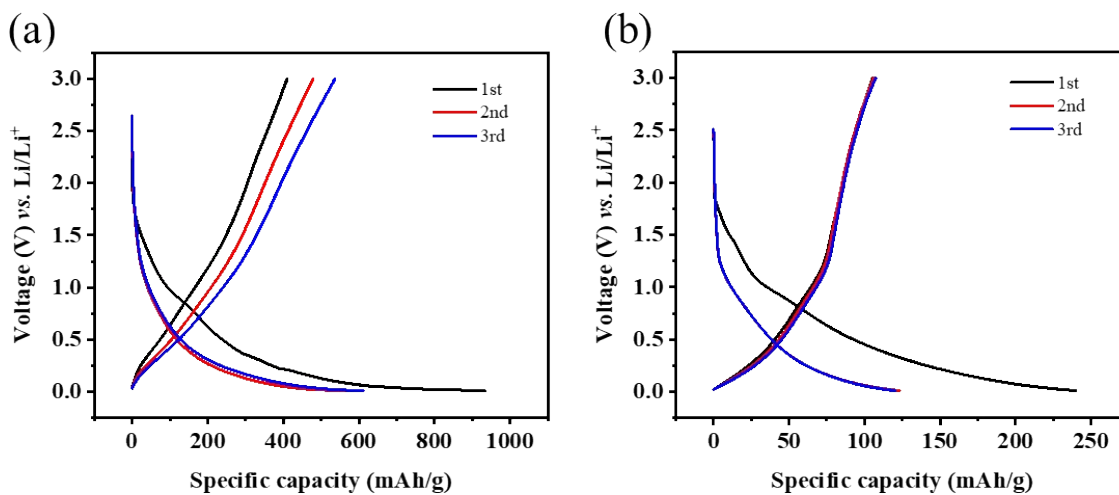

**Figure S3.** Charge and discharge profiles of (a)  $\text{SiO}_x\text{-C@CNTs-800}$  and (b)  $\text{SiO}_x\text{-C@CNTs-1000}$ .

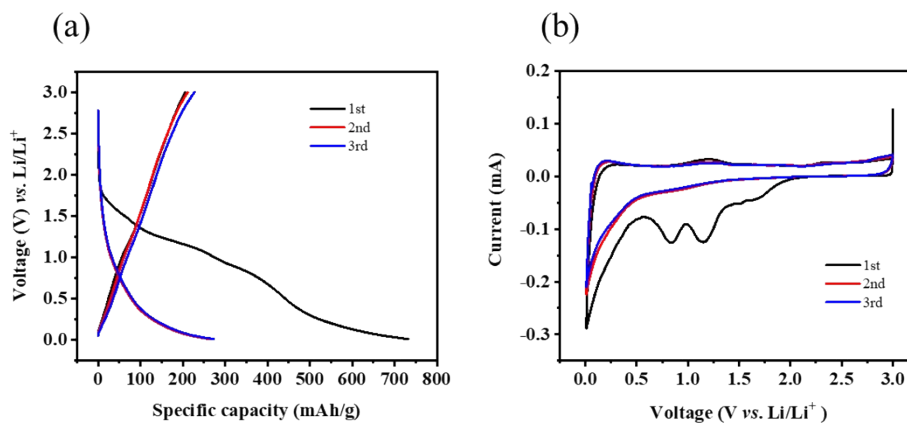

**Figure S4.** (a) Charge-discharge and (b) CV profiles of carbon material in  $\text{SiO}_x\text{-C@CNTs-900}$  (HF etching to remove  $\text{SiO}_x$ ).

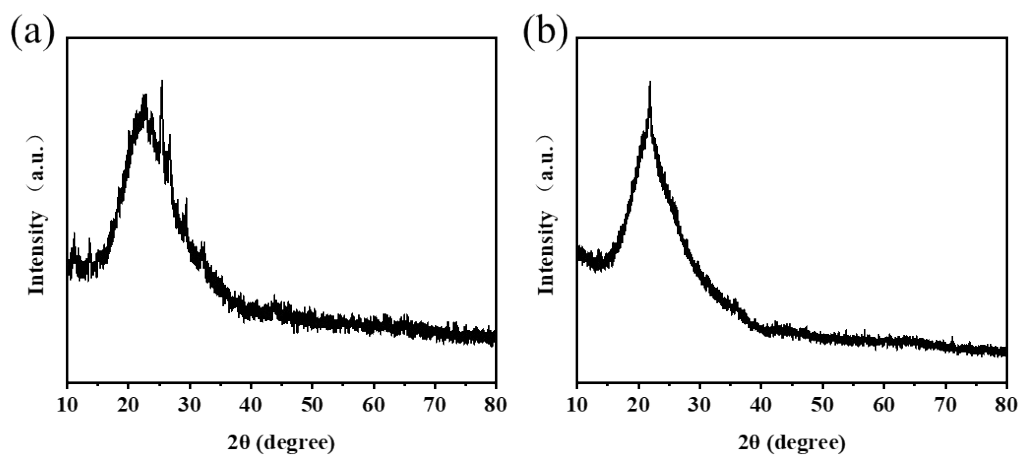

**Figure S5.** PXRD profiles of (a)  $\text{SiO}_x\text{-C@CNTs-800}$  and (b)  $\text{SiO}_x\text{-C@CNTs-1000}$ .

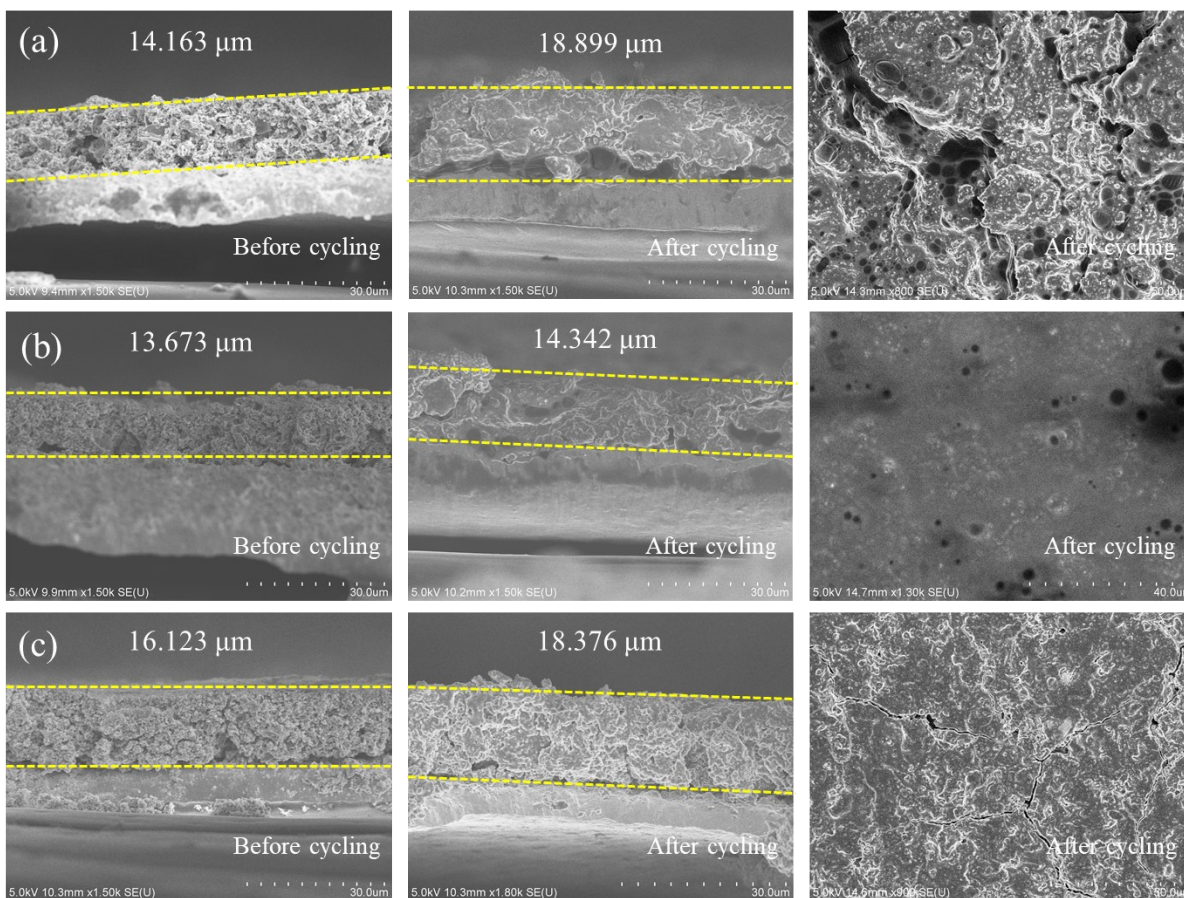

**Figure S6.** SEM images of (a) SiO<sub>x</sub>-C@CNTs-800, (b) SiO<sub>x</sub>-C@CNTs-900, and (c) SiO<sub>x</sub>-C@CNTs-1000. The used electrodes were cycled at a current density of 2 A g<sup>-1</sup> for 200 times.

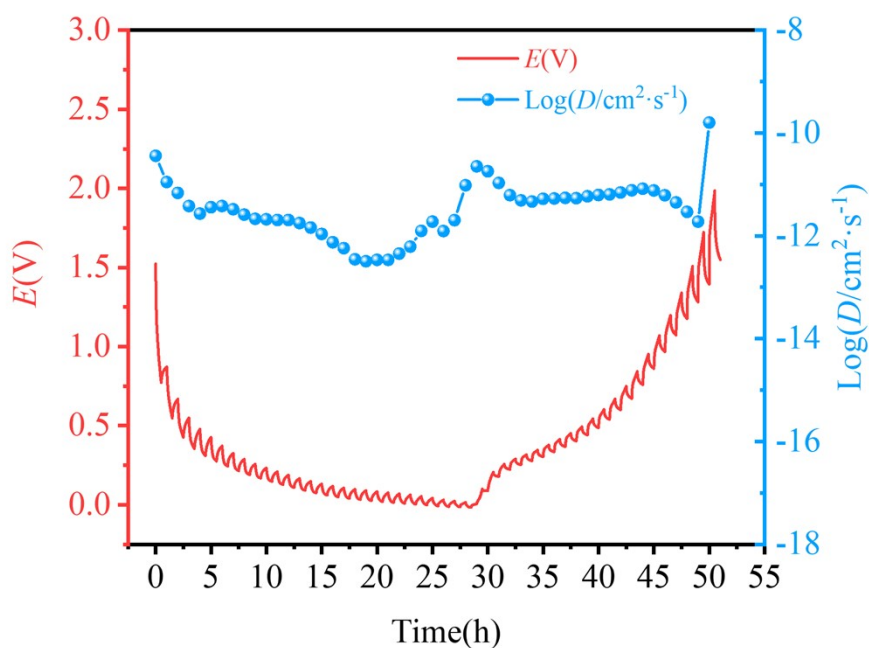

**Figure S7.** GITT profiles of the SiO<sub>x</sub>-C electrode.

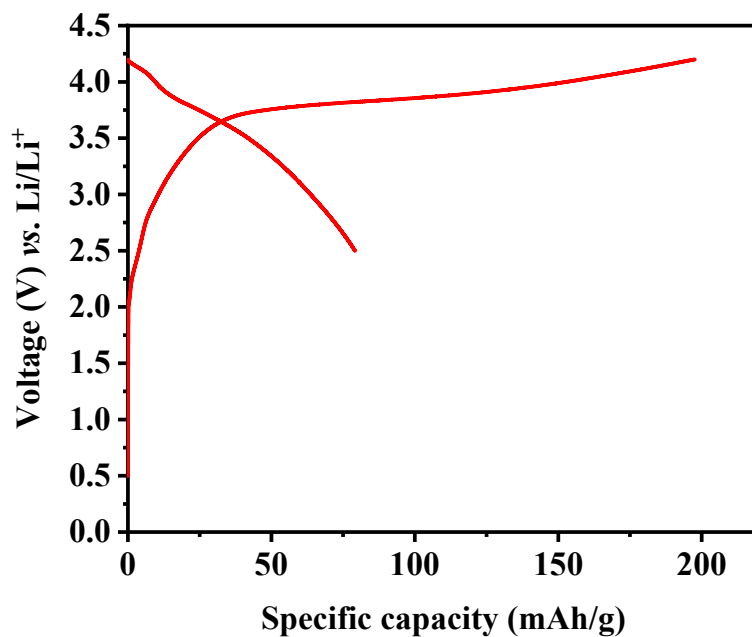

**Figure S8.** The charge-discharge voltage profiles of the  $\text{LiCoO}_2 \parallel \text{SiO}_x\text{-C@CNTs-900}$  full cell at 0.1 C.

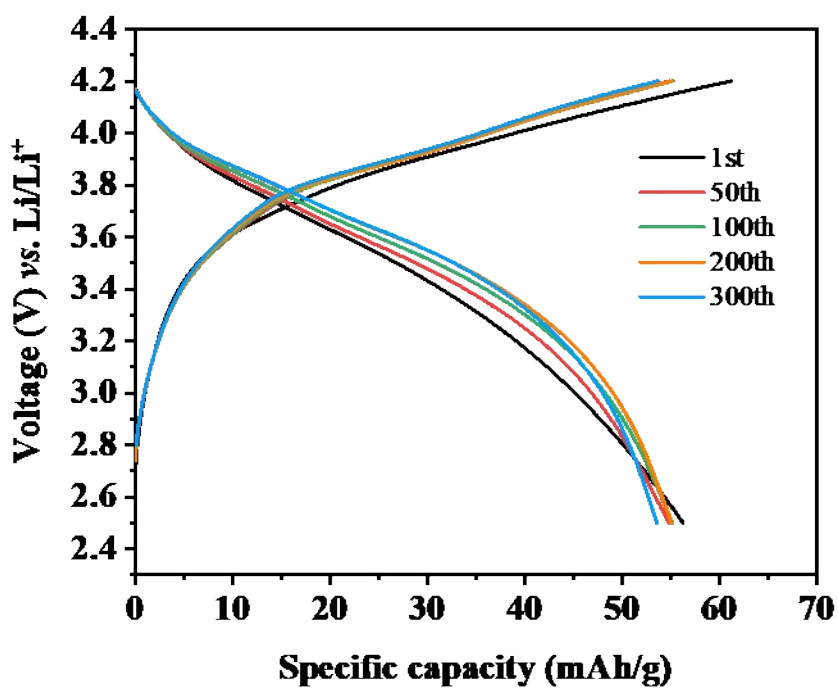

**Figure S9.** The charge-discharge voltage profiles of the  $\text{LiCoO}_2 \parallel \text{SiO}_x\text{-C@CNTs-900}$  full cell at 1 C.

**Table S1.** Electrochemical performance of the recently-reported SiO<sub>x</sub>-based anodes for half LIBs.

| <b>Samples</b>              | <b>Specific capacities<br/>(at 0.1 A g<sup>-1</sup>)</b> | <b>Cycle life</b>                                  | <b>Reference<br/>s</b>  |
|-----------------------------|----------------------------------------------------------|----------------------------------------------------|-------------------------|
| SiO <sub>x</sub> C@CNTs-900 | 848 mA h g <sup>-1</sup>                                 | 84.0% after 1500 cycles at 2 A g <sup>-1</sup>     | <b><i>This work</i></b> |
| D-SiO <sub>x</sub> -M       | 1381 mA h g <sup>-1</sup>                                | 86.0% after 300 cycles at 0.75 A g <sup>-1</sup>   | 1                       |
| SiO/1D-C/a-C                | 1204 mA h g <sup>-1</sup>                                | 82.1% after 250 cycles at 0.1 A g <sup>-1</sup>    | 2                       |
| SiO@C-L                     | 1100 mA h g <sup>-1</sup>                                | 85% after 700 cycles at 1 A g <sup>-1</sup>        | 3                       |
| SiO@TiO <sub>2</sub> /CNF   | 1244 mA h g <sup>-1</sup>                                | 82% after 200 cycles at 0.2 A g <sup>-1</sup>      | 4                       |
| pSiO <sub>x</sub> @pC       | 717.4 mA h g <sup>-1</sup>                               | No decay after 300 cycles at 1 A g <sup>-1</sup>   | 5                       |
| pC-SiO <sub>x</sub>         | 1032 mA h g <sup>-1</sup>                                | No decay after 150 cycles at 0.5 A g <sup>-1</sup> | 6                       |
| SiO-0.3LiBH <sub>4</sub>    | 1186 mA h g <sup>-1</sup>                                | 81% after 100 cycles at 0.1 A g <sup>-1</sup>      | 7                       |

**Table S2.** Cycle stability of the recently-reported SiO<sub>x</sub>-based anode materials in full lithium-ion batteries.

| Samples                     | Cycle life                              | References       |
|-----------------------------|-----------------------------------------|------------------|
| SiO <sub>x</sub> C@CNTs-900 | 95.3% after 300 cycles at 1 C           | <i>This work</i> |
| LiBp-SiO <sub>x</sub> /C@G  | 93.3% after 100 cycles at 0.2 C         | 8                |
| pre-SiOC/C                  | Not mentioned after 90 cycles at 0.5 C  | 9                |
| SCB-500                     | 84.0% after 100 cycles at 0.1 C         | 10               |
| SiO <sub>x</sub> @C@CoO     | 85.9% after 200 cycles at 0.5 C         | 11               |
| SiO@C/CNS                   | Not mentioned after 50 cycles at 1 C    | 12               |
| SiO <sub>x</sub> /NCS       | Not mentioned after 100 cycles at 1.5 C | 13               |
| SiO <sub>x</sub> @NC        | 90.2% after 100 cycles at 0.2 C         | 14               |

## References

1. A. Raza, J. Y. Jung, C. H. Lee, B. G. Kim, J. H. Choi, M. S. Park and S. M. Lee, *ACS Appl. Mater. Interfaces*, 2021, **13**, 7161-7170.
2. H. Shi, G. Shao, B. Wu, Z. Yang, H. Zhang, P. Lv and Q. Zhu, *J. Mater. Chem. A*, 2021, **9**, 26236-26247.
3. J. Han, G. Chen, T. Yan, H. Liu, L. Shi, Z. An, J. Zhang and D. Zhang, *Chem. Eng. J.*, 2018, **347**, 273-279.
4. X. Cai, W. Liu, S. Yang, S. Zhang, Q. Gao, X. Yu, J. Li, H. Wang and Y. Fang, *Adv. Mater. Interfaces*, 2019, **6**, 1801800.
5. J. Ge, Q. Tang, H. Shen, F. Zhou, H. Zhou, W. Yang, J. Hong, B. Xu and J. Saddique, *Appl. Surf. Sci.*, 2021, **552**, 149446.
6. Z. Li, Q. He, L. He, P. Hu, W. Li, H. Yan, X. Peng, C. Huang and L. Mai, *J. Mater. Chem. A*, 2017, **5**, 4183-4189.
7. W. Yang, H. Liu, Z. Ren, N. Jian, M. Gao, Y. Wu, Y. Liu and H. Pan, *Adv. Mater. Interfaces*, 2019, **6**, 1801631.
8. M. Y. Yan, G. Li, J. Zhang, Y. F. Tian, Y. X. Yin, C. J. Zhang, K. C. Jiang, Q. Xu, H. L. Li and Y. G. Guo, *ACS Appl. Mater. Interfaces*, 2020, **12**, 27202-27209.
9. X. Lin, Y. Dong, X. Liu, X. Chen, A. Li and H. Song, *Chem. Eng. J.*, 2022, **428**, 132125.
10. W. Chen, D. Xu, S. Kuang, Z. Wu, H. Hu, M. Zheng and X. Yu, *J. Power Sources*, 2021, **489**, 229459.
11. P. Wang, Z. Sun, H. Liu, Z.-W. Gao, J. Hu, W.-J. Yin, Q. Ke and H. L. Zhu, *J. Mater. Chem. A*, 2021, **9**, 18440-18453.
12. Q. Zhang, B. Xi, S. Xiong and Y. Qian, *Inorg. Chem. Front.*, 2021, **8**, 4282-4290.
13. K. Zhang, W. Du, Z. Qian, L. Lin, X. Gu, J. Yang and Y. Qian, *Carbon*, 2021, **178**, 202-210.
14. G. Hu, K. Zhong, R. Yu, Z. Liu, Y. Zhang, J. Wu, L. Zhou and L. Mai, *J. Mater. Chem. A*, 2020, **8**, 13285-13291.
